# Supplementary material for: A Systematic Review of the Prospective Relationship between Child Maltreatment and Chronic Pain
Source: MDPI journal article supplement (doi:10.3390/children8090806), 2021-09-15
Supplement: s1 [file s1]

## Supplementary Materials

**Table S1.** *Coding of Maltreatment-Related Characteristics*

| Characteristic of Child Maltreatment | Definition                                                                                                                                                                                                                                                                                                                                                                                                                                                                                                                                                                                                                                                                                                                                                                       |
|--------------------------------------|----------------------------------------------------------------------------------------------------------------------------------------------------------------------------------------------------------------------------------------------------------------------------------------------------------------------------------------------------------------------------------------------------------------------------------------------------------------------------------------------------------------------------------------------------------------------------------------------------------------------------------------------------------------------------------------------------------------------------------------------------------------------------------|
| Type                                 | We coded for the kind of child maltreatment, specifically physical abuse, sexual abuse, neglect, emotional maltreatment, and domestic partner violence exposure. For sexual abuse we coded for the presence of penetration (vaginal, anal, or oral) with a body part or foreign object. We also coded for the presence of physical violence (yes/no). We considered physical violence to be present in cases of physical abuse, rape, and other violent sexual acts. When different types of maltreatment were combined in a single measure, we coded the type of maltreatment as unspecified. Given that various kinds of abuse often occur together [20], we noted whether or not this was accounted for in the measurement of maltreatment and/or using statistical controls. |
| Bodily harm                          | We coded for bodily harm resulting from physical and sexual abuse (yes/no). We also recorded information pertaining to the specific type of harm or injury (e.g., laceration, burn, fracture). Finally, we recorded any additional information about the occurrence of other types of childhood injuries (e.g., accidental injury and intentional self-injury) because of their associations with child maltreatment [32,34,35].                                                                                                                                                                                                                                                                                                                                                 |
| Frequency                            | Frequent maltreatment was defined as maltreatment that occurred more than 10 times or was rated as occurring “often” or “frequently.” This definition is based on frequency data reported by Anderson and colleagues [91] indicating that among women who had been sexually abused, 58% of whom reported a single instance of abuse, 28% reported having been abused 2–10 times, and 14% more than 10 times. Therefore, our definition captures the higher intensity of maltreatment experienced by a portion of survivors                                                                                                                                                                                                                                                       |
| Chronicity                           | Chronic child maltreatment was defined as maltreatment that persisted for at least six months or was reported to be present at two measurement points spaced at least six months apart. This definition is consistent with definitions of chronic stress, where the stressor needs to be present for at least six months [92].                                                                                                                                                                                                                                                                                                                                                                                                                                                   |
| Developmental Stage                  | We defined early childhood as 0–5 years of age, middle childhood as 6 to 10 years of age, and adolescence as 11 to 18 years of age [23,24,43].                                                                                                                                                                                                                                                                                                                                                                                                                                                                                                                                                                                                                                   |

**Table S2.** Search Terms and Yields for Review of Traumatic Events and Chronic Pain

**Database:** Epub Ahead of Print, In-Process and Other Non-Indexed Citations, Ovid MEDLINE(R) Daily and Ovid MEDLINE(R) <1946 to Present>

Search Strategy:

- 
- 1 (adverse adj3 event?).ti,ab. (133405)
  - 2 (adverse adj3 incident?).ti,ab. (556)
  - 3 Stress Disorders, Post-Traumatic/ (28447)
  - 4 stress disorders, traumatic/ or battered child syndrome/ or combat disorders/ or stress disorders, traumatic, acute/ (4799)
  - 5 post-traumatic stress.ti,ab. (9750)
  - 6 posttraumatic stress.ti,ab. (17510)
  - 7 PTSD.ti,ab. (19269)
  - 8 (severe adj3 accident\$).ti,ab. (864)
  - 9 (severe adj3 injur\$).ti,ab. (27141)
  - 10 Survivors/px [Psychology] (8397)
  - 11 trauma\$.ti,ab. (310084)
  - 12 Bullying/ (2376)
  - 13 Child Abuse/ (20906)
  - 14 Child Abuse, Sexual/ (9644)
  - 15 Rape/ (6197)
  - 16 Sex Offenses/ (7656)
  - 17 (abus\$ adj3 (child or physical or sexual)).ti,ab. (23042)
  - 18 or/1-17 (521868)
  - 19 Chronic Pain/ (8151)
  - 20 (chronic adj3 pain).ti,ab. (50977)
  - 21 Chronic Disease/ (255754)
  - 22 chronic condition?.ti,ab. (13894)
  - 23 Pain/ and (recur\$ or chronic or persistent).ti,ab. (22437)
  - 24 (pain? adj5 (recur\$ or chronic or persistent)).ti,ab. (69710)
  - 25 Pain/ep, et, px [Epidemiology, Etiology, Psychology] (54311)
  - 26 Pain, intractable/ (6144)
  - 27 Fibromyalgia/ (7686)
  - 28 Irritable Bowel Syndrome/ (6044)
  - 29 Arthritis/ (35406)
  - 30 exp back pain/ and (recur\$ or chronic or persistent).ti,ab. (8981)
  - 31 neck pain/ and (recur\$ or chronic or persistent).ti,ab. (1542)
  - 32 Osteoarthritis/ (35175)
  - 33 Arthritis, Rheumatoid/ (94135)
  - 34 Headache/ and (recur\$ or chronic or persistent).ti,ab. (3966)

- 
- 35 Migraine/ and (recur\$ or chronic or persistent).ti,ab. (3746)
- 36 Neuralgia/ (11475)
- 37 Peripheral Nervous System Diseases/ (22216)
- 38 Complex Regional Pain Syndromes/ (1172)
- 39 Whiplash Injuries/ and (recur\$ or chronic or persistent).ti,ab. (705)
- 40 Cumulative Trauma Disorders/ and (recur\$ or chronic or persistent).ti,ab. (488)
- 41 Somatoform Disorders/ and (recur\$ or chronic or persistent).ti,ab. (1549)
- 42 (somat\$ adj3 pain).ti,ab. (1961)
- 43 or/19-42 (557592)
- 44 impact\$.ti,ab. (834620)
- 45 Influen\$.ti,ab. (1411837)
- 46 predict\$.ti,ab. (1315420)
- 47 factor\$.ti,ab. (2952954)
- 48 association?.ti,ab. (1128022)
- 49 Association/ (3869)
- 50 cross-sectional.ti,ab. (263712)
- 51 risk.mp. (2144345)
- 52 Risk/ (118699)
- 53 (related or relation\$).ti,ab. (3392028)
- 54 correlat\$.ti,ab. (1649023)
- 55 aggregat\$.ti,ab. (215239)
- 56 or/44-55 (9704939)
- 57 18 and 43 and 56 (11035)
- 58 animals/ not humans/ (4636441)
- 59 57 not 58 (10634)

**Table S3.** Variables extracted from articles included in the review.

| <b>Variable information extracted</b>                                                                                                          |
|------------------------------------------------------------------------------------------------------------------------------------------------|
| Patient characteristics                                                                                                                        |
| Sample size                                                                                                                                    |
| Study setting                                                                                                                                  |
| Follow-up period                                                                                                                               |
| Child maltreatment (yes/no)                                                                                                                    |
| Type of child maltreatment (physical abuse, emotional abuse, sexual abuse, neglect, and exposure to domestic partner violence)                 |
| Additional characteristics of child maltreatment, including the presence of physical violence (yes/no) and penetrative sexual assault (yes/no) |
| Co-occurrence of different types of child maltreatment                                                                                         |
| Frequency and chronicity of child maltreatment                                                                                                 |
| Developmental stage during which maltreatment occurred                                                                                         |
| Presence and type of abuse-related physical harm                                                                                               |
| Presence of additional childhood physical harm, including non-inflicted injury and self-harm (yes/no)                                          |
| Post-traumatic stress disorder (yes/no)                                                                                                        |
| Post-traumatic stress symptoms                                                                                                                 |
| Presence of current abuse or adult abuse (yes/no)                                                                                              |
| Pain at baseline                                                                                                                               |
| Pain outcome measures used to determine pain intensity or incidence                                                                            |
| Presence of a chronic pain condition                                                                                                           |

**Figure S1.** Study Flow Diagram.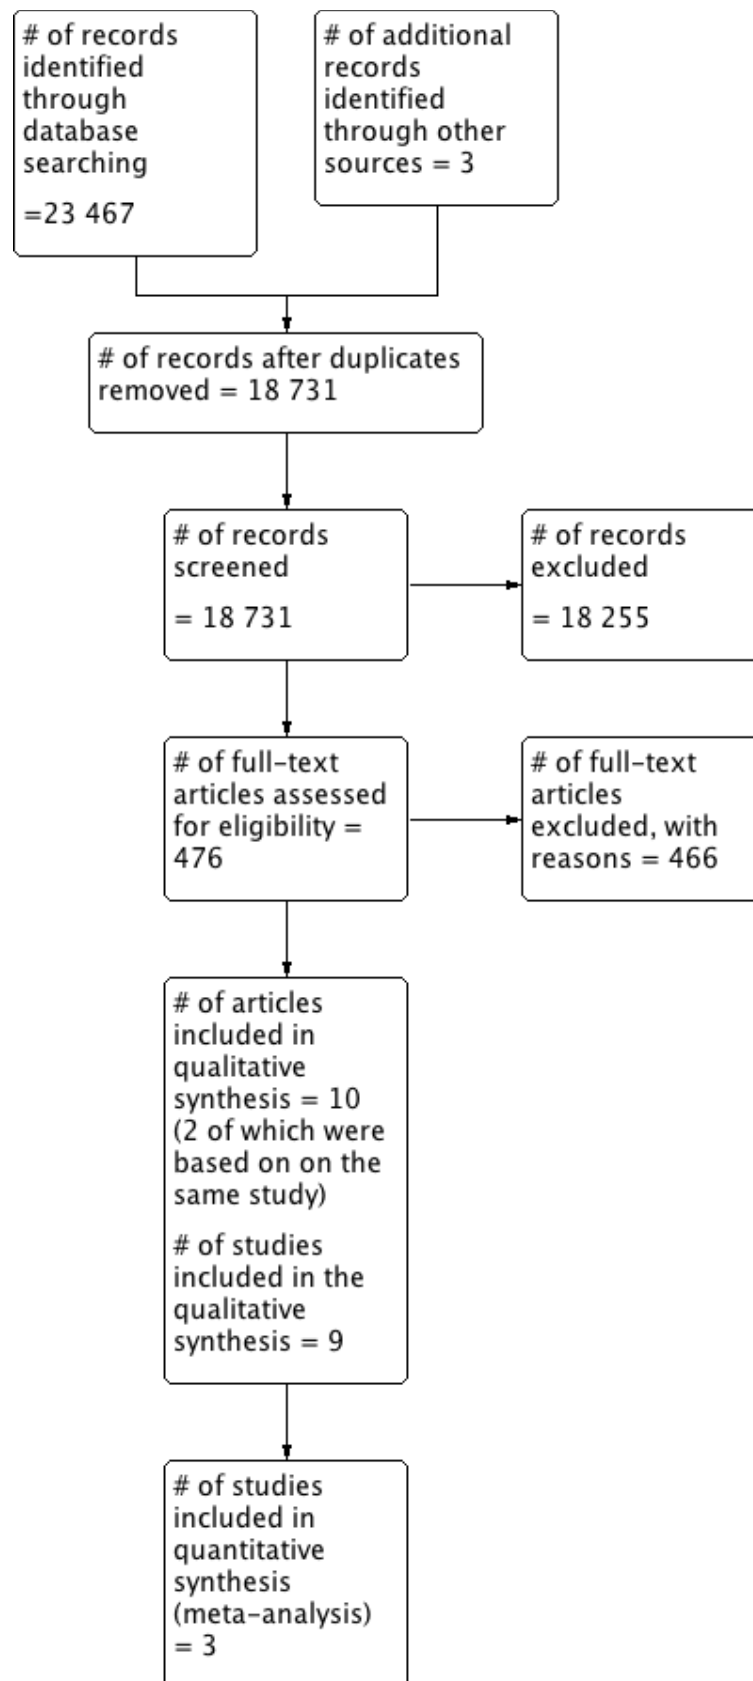

**Table S4.** Characteristics of included studies.

|           | Number of subjects with complete data | Age at baseline (mean (SD) or range in years) plus baseline pain status                                                                                                                   | Child maltreatment measure plus prevalence data                                                                                                                                                                            | Developmental timing of maltreatment | Recency of maltreatment exposure | Measurement, reporting, and analysis of proposed moderators                                                                                                                                                                                        | Measures of pain and pain interference, and whether chronic pain was captured                                                               | Pain measurement timepoint(s) <sup>1</sup> |
|-----------|---------------------------------------|-------------------------------------------------------------------------------------------------------------------------------------------------------------------------------------------|----------------------------------------------------------------------------------------------------------------------------------------------------------------------------------------------------------------------------|--------------------------------------|----------------------------------|----------------------------------------------------------------------------------------------------------------------------------------------------------------------------------------------------------------------------------------------------|---------------------------------------------------------------------------------------------------------------------------------------------|--------------------------------------------|
| Beal 2020 | 383                                   | Maltreated 15.2 (1.1)<br><br>Comparison 15.3 (1.04)<br><br>Caregiver reports of pain at baseline = 49% in the maltreatment and 59% in the comparison sample for past 2-year pain symptoms | Official reports + structured interview<br><br>Comprehensive Trauma Interview for maltreatment experiences by type [70].<br><br>Of 273 cases, there were 31% allegations for physical abuse, 49% for sexual abuse, 15% for | Adolescence                          | Approximately 10 years           | <u>Moderators measured</u><br>Abuse type (sexual abuse, physical abuse, neglect)<br>PTSS (Comprehensive Trauma Interview) [70]<br><u>Moderators reported</u> <sup>2</sup><br>Abuse type (abuse only, neglect only, both abuse and neglect)<br>PTSS | Measure of pain = self-reported pain (yes/no)<br>Measure of pain interference? No<br>Brief Pain Inventory [77]<br>Chronic pain captured? No | Baseline and 9-year follow-up              |

|             | Number of subjects with complete data | Age at baseline (mean (SD) or range in years) plus baseline pain status                | Child maltreatment measure plus prevalence data                                                                                                                              | Developmental timing of maltreatment | Recency of maltreatment exposure | Measurement, reporting, and analysis of proposed moderators                                                                                                                                                                                       | Measures of pain and pain interference, and whether chronic pain was captured                                                                    | Pain measurement timepoint(s) <sup>1</sup> |
|-------------|---------------------------------------|----------------------------------------------------------------------------------------|------------------------------------------------------------------------------------------------------------------------------------------------------------------------------|--------------------------------------|----------------------------------|---------------------------------------------------------------------------------------------------------------------------------------------------------------------------------------------------------------------------------------------------|--------------------------------------------------------------------------------------------------------------------------------------------------|--------------------------------------------|
|             |                                       |                                                                                        | neglect, 5% for multiple types                                                                                                                                               |                                      |                                  | <u>Moderators analyzed</u> <sup>3</sup><br>None                                                                                                                                                                                                   |                                                                                                                                                  |                                            |
| Biskin 2014 | 231                                   | 27.0 (6.3)<br><br>Pain at baseline in borderline personality disorder sample = unknown | Semi-Structured Interview<br><br>Revised Childhood Experiences Questionnaire (CEQ-R) [81]<br><br>No descriptive data provided regarding maltreatment exposures in BPD sample | Unknown (<18 years)                  | Unknown                          | <u>Moderators measured</u><br>Abuse type (sexual (yes/no), verbal and physical combined, neglect)<br>Chronic maltreatment<br>PTSD<br>The Structured Clinical Interview for DSM-III-R Axis I Disorders (SCID-I) [82]<br><u>Moderators reported</u> | Measure of pain = self-reported pain severity<br>Measure of pain interference? Yes<br>The Brief Pain Inventory [77]<br>Chronic pain captured? No | 16-year follow-up                          |

|            | Number of subjects with complete data | Age at baseline (mean (SD) or range in years) plus baseline pain status                                 | Child maltreatment measure plus prevalence data                                                             | Developmental timing of maltreatment | Recency of maltreatment exposure | Measurement, reporting, and analysis of proposed moderators                                                                               | Measures of pain and pain interference, and whether chronic pain was captured                                       | Pain measurement timepoint(s) <sup>1</sup> |
|------------|---------------------------------------|---------------------------------------------------------------------------------------------------------|-------------------------------------------------------------------------------------------------------------|--------------------------------------|----------------------------------|-------------------------------------------------------------------------------------------------------------------------------------------|---------------------------------------------------------------------------------------------------------------------|--------------------------------------------|
|            |                                       |                                                                                                         |                                                                                                             |                                      |                                  | Abuse type (sexual (yes/no), verbal and physical combined, neglect)<br>Chronic maltreatment<br>PTSD<br><u>Moderators analyzed</u><br>None |                                                                                                                     |                                            |
| Brown 2005 | 602                                   | 22<br><br>Pain at baseline: 13.4% of sample reported frequent pain and 18.5% of sample reported chronic | Official reports<br><br>4.6% of sample had a documented history of physical abuse and/or neglect, including | Unspecific (<18 y.o.)                | Unknown                          | <u>Moderators measured</u><br>Abuse type (sexual abuse, physical abuse, neglect)<br><u>Moderators reported</u>                            | Measure of pain = self-reported “frequent pain”<br>Measure of pain interference? Yes<br><br>Measured using a single | All data collected at single timepoint     |



|            | Number of subjects with complete data | Age at baseline (mean (SD) or range in years) plus baseline pain status          | Child maltreatment measure plus prevalence data                                                                               | Developmental timing of maltreatment | Recency of maltreatment exposure | Measurement, reporting, and analysis of proposed moderators                                                                                      | Measures of pain and pain interference, and whether chronic pain was captured                                                        | Pain measurement timepoint(s) <sup>1</sup> |
|------------|---------------------------------------|----------------------------------------------------------------------------------|-------------------------------------------------------------------------------------------------------------------------------|--------------------------------------|----------------------------------|--------------------------------------------------------------------------------------------------------------------------------------------------|--------------------------------------------------------------------------------------------------------------------------------------|--------------------------------------------|
|            |                                       | pain in past year that impaired functioning.                                     | 14 cases of physical abuse, 16 cases of neglect (with no abuse), and 4 cases of sexual abuse.                                 |                                      |                                  | Abuse type (physical abuse, neglect)<br>*Too few cases of sexual abuse to examine separately<br><u>Moderators analyzed</u><br>None               | question for each.<br><br>Chronic pain captured? Yes, but for pain impairment only                                                   |                                            |
| Kopec 2005 | 9552                                  | Age 18-24<br>11.8%<br>Age 25-44<br>41%<br>Age 45-64<br>26.8%<br>Age 65+<br>20.4% | Self-report questionnaire<br><br>Single question developed by researchers at Statistics Canada based on unpublished analyses. | Unspecified (<18 y.o.)               | Unknown                          | <u>Moderators measured</u><br>Abuse type (physical)<br><u>Moderators reported</u><br>Abuse type (physical)<br><u>Moderators analyzed</u><br>None | Measure of pain = self-reported onset of back pain<br>Measure of pain interference? No<br><br>Interviewer-administered questionnaire | Baseline and 4-year follow-up              |

|                             | Number of subjects with complete data | Age at baseline (mean (SD) or range in years) plus baseline pain status                                                                             | Child maltreatment measure plus prevalence data                                                                                                                    | Developmental timing of maltreatment | Recency of maltreatment exposure | Measurement, reporting, and analysis of proposed moderators                                                                                                                                                                    | Measures of pain and pain interference, and whether chronic pain was captured                                                                                  | Pain measurement timepoint(s) <sup>1</sup> |
|-----------------------------|---------------------------------------|-----------------------------------------------------------------------------------------------------------------------------------------------------|--------------------------------------------------------------------------------------------------------------------------------------------------------------------|--------------------------------------|----------------------------------|--------------------------------------------------------------------------------------------------------------------------------------------------------------------------------------------------------------------------------|----------------------------------------------------------------------------------------------------------------------------------------------------------------|--------------------------------------------|
|                             |                                       | Pain at baseline: Participants were free of back pain at baseline.                                                                                  | 6.5% of sample reported any exposure to physical abuse                                                                                                             |                                      |                                  |                                                                                                                                                                                                                                | (single question).<br><br>Chronic pain captured? Yes                                                                                                           |                                            |
| Lamers -Win-<br>kelman 2012 | 275                                   | 8.62 (1.7)<br><br>Pain at baseline: 7.7% aches and pains, 9.9% headache, and 13.5% stomach ache among children exposed to domestic partner violence | Maltreatment data collected from multiple informants<br><br>Parent reports (Parent Report of Traumatic Impact [83] plus interviews)<br><br>Official agency reports | Middle childhood                     | Unknown                          | <u>Moderators measured</u><br>Abuse type (physical abuse, contact sexual abuse, emotional abuse (recurrent humiliation), neglect)<br><u>Moderators reported</u><br>Abuse type (physical abuse, contact sexual abuse, emotional | Measure of pain = parent reports of aches and pains, stomach ache, headache<br><br>Measure of pain interference? No<br><br>Somatic Complaints Scale within the | All data collected at single timepoint     |

|             | Number of subjects with complete data | Age at baseline (mean (SD) or range in years) plus baseline pain status               | Child maltreatment measure plus prevalence data                                                                                                                                       | Developmental timing of maltreatment | Recency of maltreatment exposure | Measurement, reporting, and analysis of proposed moderators                   | Measures of pain and pain interference, and whether chronic pain was captured  | Pain measurement timepoint(s) <sup>1</sup> |
|-------------|---------------------------------------|---------------------------------------------------------------------------------------|---------------------------------------------------------------------------------------------------------------------------------------------------------------------------------------|--------------------------------------|----------------------------------|-------------------------------------------------------------------------------|--------------------------------------------------------------------------------|--------------------------------------------|
|             |                                       |                                                                                       | Prevalence of additional maltreatment among children exposed to domestic partner violence: 53% for physical abuse, 11% for sexual abuse, 36% for emotional abuse, and 36% for neglect |                                      |                                  | abuse (recurrent humiliation), neglect)<br><u>Moderators analyzed</u><br>None | Child Behavior Checklist [84]<br><br>Chronic pain captured? Yes                |                                            |
| Linton 2002 | 417                                   | 35 – 45<br><br>Pain at baseline:<br><u>No pain group</u> (46%): participants reported | Self-report questionnaire<br><br>5 questions from previous studies [85,86]                                                                                                            | Unspecified (<14 y.o.)               | >20 years                        | <u>Moderators measured</u><br>Abuse type (sexual)<br>Frequent sexual abuse    | Measure of pain = self-reported spinal pain. Measure of pain interference? Yes | Baseline and one-year follow-up            |

| Number of subjects with complete data | Age at baseline (mean (SD) or range in years) plus baseline pain status                                         | Child maltreatment measure plus prevalence data                                                                 | Developmental timing of maltreatment | Recency of maltreatment exposure | Measurement, reporting, and analysis of proposed moderators                             | Measures of pain and pain interference, and whether chronic pain was captured                                                                                                                                                                                     | Pain measurement timepoint(s) <sup>1</sup> |
|---------------------------------------|-----------------------------------------------------------------------------------------------------------------|-----------------------------------------------------------------------------------------------------------------|--------------------------------------|----------------------------------|-----------------------------------------------------------------------------------------|-------------------------------------------------------------------------------------------------------------------------------------------------------------------------------------------------------------------------------------------------------------------|--------------------------------------------|
|                                       | that they had not suffered any spinal pain in past year<br><u>Pain group</u><br>(54%)—any pain in the past year | Prevalence data includes adult exposures—23% reported some form of sexual abuse and 22% reported physical abuse |                                      |                                  | <u>Moderators reported</u><br>Abuse type (sexual)<br><u>Moderators analyzed</u><br>None | Pain was measured using questions to assess back and neck pain, and if present, pain intensity. Physical function was measured using self-administered physical function tests [87].<br><br>Chronic pain captured? Unclear for pain and no for physical function. |                                            |

|                                 | Number of subjects with complete data | Age at baseline (mean (SD) or range in years) plus baseline pain status                                                                  | Child maltreatment measure plus prevalence data                                                                                         | Developmental timing of maltreatment | Recency of maltreatment exposure | Measurement, reporting, and analysis of proposed moderators                                                                                                                                                                                                                                   | Measures of pain and pain interference, and whether chronic pain was captured                                                                                                                                                    | Pain measurement timepoint(s) <sup>1</sup> |
|---------------------------------|---------------------------------------|------------------------------------------------------------------------------------------------------------------------------------------|-----------------------------------------------------------------------------------------------------------------------------------------|--------------------------------------|----------------------------------|-----------------------------------------------------------------------------------------------------------------------------------------------------------------------------------------------------------------------------------------------------------------------------------------------|----------------------------------------------------------------------------------------------------------------------------------------------------------------------------------------------------------------------------------|--------------------------------------------|
| Raphael 2011 (and Raphael 2001) | 807                                   | 29.1 years<br><br>Pain at baseline: pain symptom counts for any maltreatment group was 2.51 (0.08) and for control group was 2.32 (0.09) | Official reports<br><br>Of 458 with documented maltreatment, 13% cases of sexual abuse, 17% cases of physical, and 81% cases of neglect | Early childhood and middle childhood | Approximately 30 years           | <u>Moderators measured</u><br><br>Abuse type (physical abuse, sexual abuse, and neglect)<br>PTSD (National Institutes of Mental Health Diagnostic Interview Schedule Version III-R) [47].<br><u>Moderators reported</u><br><br>Abuse type (physical abuse, sexual abuse, and neglect)<br>PTSD | Measure of pain = self-reported pain symptoms<br>Measure of pain interference? Yes<br><br>All pain indices derived from the somatization module of the Diagnostic Interview Schedule III-R [47]<br><br>Chronic pain captured? No | Baseline and 10-year follow-up             |

|             | Number of subjects with complete data | Age at baseline (mean (SD) or range in years) plus baseline pain status | Child maltreatment measure plus prevalence data                                                                                                                                                                      | Developmental timing of maltreatment               | Recency of maltreatment exposure                               | Measurement, reporting, and analysis of proposed moderators                                                                                                                                                                            | Measures of pain and pain interference, and whether chronic pain was captured                                                                                                                          | Pain measurement timepoint(s) <sup>1</sup>        |
|-------------|---------------------------------------|-------------------------------------------------------------------------|----------------------------------------------------------------------------------------------------------------------------------------------------------------------------------------------------------------------|----------------------------------------------------|----------------------------------------------------------------|----------------------------------------------------------------------------------------------------------------------------------------------------------------------------------------------------------------------------------------|--------------------------------------------------------------------------------------------------------------------------------------------------------------------------------------------------------|---------------------------------------------------|
|             |                                       |                                                                         |                                                                                                                                                                                                                      |                                                    |                                                                | <u>Moderators analyzed</u><br>PTSD                                                                                                                                                                                                     |                                                                                                                                                                                                        |                                                   |
| Rimsza 1988 | 144                                   | 10 (with range of 2-17)<br><br>Pain at baseline = unknown               | Clinical interview, with verification by physical examination for patients aged 2-4.<br><br>Of 72 sexual abuse patients, 61% reported penile vaginal penetration, 28% reported genital fondling, including nonpenile | Early childhood, middle childhood, and adolescence | Unknown (although it appears that exposures were quite recent) | <u>Moderators measured</u><br>Abuse type (penile vaginal penetration, no penile vaginal penetration)<br>Stable/prolonged abuse<br><u>Moderators reported</u><br>Abuse type (penile vaginal penetration, no penile vaginal penetration) | Measure of pain = headaches, chest pain, back pain, abdominal pain, vaginal pain<br>Measure of pain interference? No<br>Measured via chart review, sometimes with the addition of phone interview with | 2-year follow-up (with range from 9 to 48 months) |

|                    | Number of subjects with complete data | Age at baseline (mean (SD) or range in years) plus baseline pain status                                                                | Child maltreatment measure plus prevalence data                                                                              | Developmental timing of maltreatment                                                           | Recency of maltreatment exposure | Measurement, reporting, and analysis of proposed moderators                                                                                                             | Measures of pain and pain interference, and whether chronic pain was captured                                                     | Pain measurement timepoint(s) <sup>1</sup>                                            |
|--------------------|---------------------------------------|----------------------------------------------------------------------------------------------------------------------------------------|------------------------------------------------------------------------------------------------------------------------------|------------------------------------------------------------------------------------------------|----------------------------------|-------------------------------------------------------------------------------------------------------------------------------------------------------------------------|-----------------------------------------------------------------------------------------------------------------------------------|---------------------------------------------------------------------------------------|
|                    |                                       |                                                                                                                                        | vaginal penetration, 12.5% reported sodomy, 19.4% reported oral-genital contact (categories are not mutually exclusive).     |                                                                                                |                                  | Stable/prolonged abuse<br><u>Moderators analyzed</u><br>None                                                                                                            | primary caregiver.<br><br>Chronic pain captured? Unclear for all outcomes                                                         |                                                                                       |
| Sachs-Ericson 2017 | 5001                                  | 33.03 (10.5)<br><br>Pain at baseline -Pain experienced as a result of health problems (scale ranging from 0 to 3)—mean baseline scores | Semi-structured interview<br><br>Items from the PTSD module of the Composite International Diagnostic Interview [89] and the | Unspecified (<18 y.o. for verbal and physical abuse and neglect and <15 y.o. for sexual abuse) | 30 - 40 years                    | <u>Moderators measured</u><br><br>Abuse type (sexual, physical, emotional/verbal)<br><br>Frequent abuse<br><br>PTSD (Composite International Diagnostic Interview) [89] | Measure of pain = self-reported number of painful medical disorders (arthritis or rheumatism, chronic back or neck problems, fre- | Baseline pain severity<br><br>Painful medical disorders from<br><br>10-year follow-up |

| Number of subjects with complete data | Age at baseline (mean (SD) or range in years) plus baseline pain status | Child maltreatment measure plus prevalence data                      | Developmental timing of maltreatment | Recency of maltreatment exposure | Measurement, reporting, and analysis of proposed moderators                                                                                   | Measures of pain and pain interference, and whether chronic pain was captured                                                                                                     | Pain measurement timepoint(s) <sup>1</sup> |
|---------------------------------------|-------------------------------------------------------------------------|----------------------------------------------------------------------|--------------------------------------|----------------------------------|-----------------------------------------------------------------------------------------------------------------------------------------------|-----------------------------------------------------------------------------------------------------------------------------------------------------------------------------------|--------------------------------------------|
|                                       | was 0.3 (SD=.77)                                                        | childhood history section of the National Comorbidity Survey (NCS-1) |                                      |                                  | <u>Moderators reported</u><br>Abuse type (sexual, physical, emotional/verbal)<br>Frequent abuse<br>PTSD<br><u>Moderators analyzed</u><br>None | quent or severe headache, or other chronic pain)<br>Measure of pain interference? No<br>Questions from the National Comorbidity Survey [90]<br><br>Chronic pain captured? Unclear |                                            |



3 *Notes*

4 <sup>1</sup>Given that some studies relied on retrospective reports of maltreatment, the timespan between the maltreatment exposure and pain measurement often exceeds that of study  
5 follow-up period.

6 <sup>2</sup>Indicates whether descriptive information and/or the association between the moderator and pain outcome(s) was reported.

7 <sup>3</sup>Indicates whether a moderation analysis was conducted and reported.

8

**Table S5.** Summary of risk of bias assessment based on the Quality in Prognosis Studies tool [56]. Judgments (low, moderate or high) for the six risk-of-bias domains shown for each study and the overall study rating for each (low or high).

| Study                              | Study participation                                                                 | Study attrition                                                                     | Measurement of exposure                                                             | Measurement of outcome                                                              | Study confounding                                                                   | Statistical analysis and                                                              | Overall rating |
|------------------------------------|-------------------------------------------------------------------------------------|-------------------------------------------------------------------------------------|-------------------------------------------------------------------------------------|-------------------------------------------------------------------------------------|-------------------------------------------------------------------------------------|---------------------------------------------------------------------------------------|----------------|
| Beal 2020                          |    |    |    |    |    |    | Low            |
| Biskin 2014                        |    |    |    |    |    |    | High           |
| Brown 2005                         |    |    |    |    |    |    | Low            |
| Kopec 2005                         |    |    |    |    |    |    | Low            |
| Lamers-Winkelman 2012 <sup>a</sup> |    | N/A                                                                                 |    |    |    |    | High           |
| Linton 2002 <sup>b</sup>           |  |  |  |  |  |  | Low            |
|                                    |                                                                                     |                                                                                     |                                                                                     |  |                                                                                     |                                                                                       |                |
| Raphael 2011                       |  |  |  |  |  |  | Low            |
| Rimsza 1988                        |  |  |  |  |  |  | High           |
| Sachs-Ericsson 2017                |  |  |  |  |  |  | Low            |

 Low Risk of Bias

 Moderate Risk of Bias

 High Risk of Bias

*Notes.*

<sup>a</sup>The Lamers-Winkelman et al. (2012) study was not rated along the Study Attrition dimension because this was a cross-sectional study. Although the Brown et al. (2005) findings were also based on cross-sectional data, these data were from a larger cohort study, therefore study attrition remained a potential source of bias.

<sup>b</sup>Two risk-of-bias ratings are reported for the Measurement of Outcome domain because there were two reported outcomes with differing ratings (i.e., moderate for the measure of pain and low for the measure of pain interference). In cases of multiple outcomes reported in other studies, the risk of bias ratings was constant across outcomes.

**Table S6.** Grading of Recommendations, Assessment, Development and Evaluation (GRADE).

| Research question                                                              | Exposure variable                                                     | Number of studies (participants) | Unadjusted |   |   | Adjusted |   |   | Number of studies (participants) in meta-analysis | Odds ratio (95% CI) for adjusted analysis | GRADE Factors     |               |              |             |                  |                            |             | Overall quality |
|--------------------------------------------------------------------------------|-----------------------------------------------------------------------|----------------------------------|------------|---|---|----------|---|---|---------------------------------------------------|-------------------------------------------|-------------------|---------------|--------------|-------------|------------------|----------------------------|-------------|-----------------|
|                                                                                |                                                                       |                                  | +          | 0 | - | +        | 0 | - |                                                   |                                           | Study limitations | Inconsistency | Indirectness | Imprecision | Publication bias | Moderate/large effect size | Dose effect |                 |
| What is the relationship between any child maltreatment and pain at follow-up? | Any child maltreatment (sexual abuse, physical abuse, and/or neglect) | 3 (1,421)                        | 2          | 0 | 0 | 1        | 2 | 0 | 0                                                 | NA                                        | ✓                 | ✓             | X            | ✓           | X                | X                          | X           | ++              |
| What is the evidence regarding                                                 | PTSD or PTSS                                                          | 1 (807)                          | 0          | 0 | 0 | 1        | 0 | 0 | 0                                                 | NA                                        | ✓                 | NA            | X            | ✓           | X                | ✓                          | X           | ++              |

[illegible]

| Research ques-<br>tion | Exposure variable                      | Number<br>of stud-<br>ies (par-<br>ticipants) | Unadjusted |   |   | Adjusted |   |   | GRADE Factors                                                     |                                                 |                   |               |              |             |                  | Overall<br>quality |                            |                  |
|------------------------|----------------------------------------|-----------------------------------------------|------------|---|---|----------|---|---|-------------------------------------------------------------------|-------------------------------------------------|-------------------|---------------|--------------|-------------|------------------|--------------------|----------------------------|------------------|
|                        |                                        |                                               | +          | 0 | - | +        | 0 | - | Number of<br>studies (par-<br>ticipants) in<br>meta-analy-<br>sis | Odds ratio (95%<br>CI) for adjusted<br>analysis | Study limitations | Inconsistency | Indirectness | Imprecision | Publication bias |                    | Moderate/large effect size | Dose effect      |
|                        | Developmental stage<br>of maltreatment | N/A                                           |            |   |   |          |   |   |                                                                   |                                                 |                   |               |              |             |                  |                    |                            | No evi-<br>dence |

*Note.* For unadjusted and adjusted analyses: +, number of significant effects in expected direction; 0, number of non-significant effects; -, number of significant effects in unexpected direction. For GRADE factors, ✓, no serious limitations; X, serious limitations (or not present for moderate/large effect size, dose effect). For overall quality of evidence: +, very low; ++, low; +++, moderate; ++++, high.
